# Supplementary material
Source: publisher figshare collection journal article supplement (https://gsajournals.figshare.com/ndownloader/files/17502362)
Supplement: Supplementary file 1 [file 17502362]

**
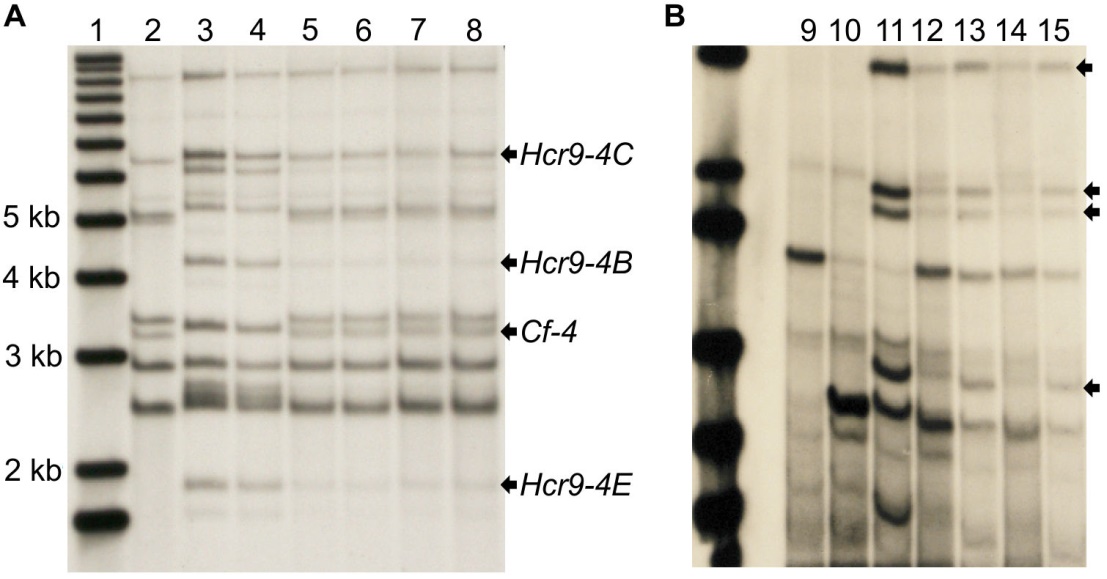
**

**FIGURE S4 | DNA gel blot analysis of Ont7716 with *Hcr9*- and *Hcr2*-specific probes.** (A) DNA gel blot showing (1) 1kb-plus DNA ladder, (2) Cf0, (3) Cf4, (4) Cf11, (5) 105R, (6) 105S, (7) 106R, and (8) 106S genomic DNA probed with a Hcr9-specific probe. The genomic DNA samples were digested with *Bgl*II and probed using a fragment derived from the *Hcr9-9C* (*Cf-9*) gene. (B) DNA gel blot showing (9) Cf0, (10) Cf2, (11) Cf11, (12) 105R, (13) 105S, (14) 106R, and (15) 106S. Genomic DNA was digested with *Eco*RV and probed with a PCR product derived from the *Cf-2* gene. Bulked segregant DNA pools were prepared from the resistant and susceptible plants of segregating F2 families 105 and 106 from a Cf2 x Cf11 cross (designated 105R, 105S, 106R and 106S respectively). The *Hcr9* sequences originating from the Cf4 haplotype were present in both resistant and susceptible bulks, and hence not suitable for generating a mapping population for Ont7716. The *Hcr2* sequences from Cf2 haplotype were linked to resistance and suitable for further analysis to identify molecular markers linked to the *Cf-11* locus. Black arrows show (A) specific *Hcr9*s and (B) sequence bands linked to *Cf-11*-induced resistance.
